# Supplementary material for: Predicting Fluid Responsiveness Using Bedside Ultrasound Measurements of the Inferior Vena Cava and Physician Gestalt in the Emergency Department of an Urban Public Hospital in Sub-Saharan Africa
Source: PubMed Central journal article supplement (PMC5038941; doi:10.1371/journal.pone.0162772), 2016-09-27
Supplement: pone.0162772.s001.pdf [file pone.0162772.s001.pdf]

| IVC_no | Vol_depletion | Main        | Physical_exam             | Age | Sex | Intubation | Cib | MAPb | Pulse_b | Cl_500cc | MAP_500cc | Pulse_500cc | Cl_1000cc | MAP_1000cc | Pulse_1000cc | Cl_1500cc | MAP_1500cc | Pulse_1500cc | Cl_2000 | MAP_2000cc |
|--------|---------------|-------------|---------------------------|-----|-----|------------|-----|------|---------|----------|-----------|-------------|-----------|------------|--------------|-----------|------------|--------------|---------|------------|
| 1      | mild          | sepsis      | Tachycardia               | 61  | 0   | yes        | 30  | 74   | 110     | 20       | 75        | 110         | 30        | 77         | 100          | 4         | 78         | 92           |         |            |
| 2      | mild          | hemorrhage  | hypotension               | 26  | 1   | no         | 12  | 74   | 111     | 6        | 75        | 108         | 21        | 78         | 102          | 14        | 80         | 96           |         |            |
| 3      | severe        | hemorrhage  | hypotension               | 28  | 0   | no         | 55  | 58   | 102     | 46       | 69        | 101         | 26        | 73         | 98           | 21        | 79         | 96           |         |            |
| 4      | mild          | poor intake | dryness of mucus membrane | 36  | 1   | no         | 50  | 69   | 92      | 44       | 83        | 90          | 9         | 87         | 86           |           |            |              |         |            |
| 5      | mild          | vomiting    | Tachycardia               | 56  | 1   | no         | 46  | 80   | 99      | 40       | 81        | 98          | 24        | 85         | 96           |           |            |              |         |            |
| 6      | mild          | hemorrhage  | Tachycardia               | 26  | 0   | no         | 43  | 81   | 109     | 9        | 84        | 106         | 21        | 89         | 92           |           |            |              |         |            |
| 7      | mild          | hemorrhage  | hypotension               | 36  | 0   | no         | 16  | 65   | 104     | 12       | 65        | 100         | 27        | 67         | 101          | 25        | 80         | 98           |         |            |
| 8      | mild          | diarrhoea   | Tachycardia               | 43  | 1   | no         | 42  | 81   | 102     | 30       | 86        | 98          |           |            |              |           |            |              |         |            |
| 9      | mild          | diarrhoea   | Tachycardia               | 33  | 0   | no         | 35  | 87   | 114     | 29       | 87        | 108         |           |            |              |           |            |              |         |            |
| 10     | severe        | hemorrhage  | hypotension               | 42  | 1   | no         | 61  | 56   | 108     | 45       | 64        | 106         | 31        | 72         | 96           | 26        | 67         | 92           |         |            |
| 11     | moderate      | hemorrhage  | hypotension               | 32  | 1   | no         | 58  | 59   | 109     | 50       | 65        | 102         | 12        | 78         | 98           | 9         | 79         | 90           |         |            |
| 12     | mild          | hemorrhage  | dryness of mucus membrane | 31  | 0   | no         | 35  | 80   | 112     | 12       | 81        | 111         |           |            |              |           |            |              |         |            |
| 13     | mild          | hemorrhage  | dryness of mucus membrane | 28  | 1   | no         | 30  | 82   | 102     | 13       | 81        | 102         |           |            |              |           |            |              |         |            |
| 14     | mild          | vomiting    | dryness of mucus membrane | 28  | 0   | no         | 35  | 74   | 88      | 26       | 74        | 86          |           |            |              |           |            |              |         |            |
| 15     | mild          | poor intake | dryness of mucus membrane | 29  | 1   | no         | 30  | 82   | 94      | 16       | 80        | 90          |           |            |              |           |            |              |         |            |
| 16     | mild          | sepsis      | Tachycardia               | 61  | 0   | yes        | 28  | 74   | 110     | 21       | 75        | 110         |           |            |              |           |            |              |         |            |
| 17     | mild          | poor intake | dryness of mucus membrane | 19  | 0   | no         | 26  | 72   | 88      | 25       | 80        | 86          |           |            |              |           |            |              |         |            |
| 18     | moderate      | hemorrhage  | hypotension               | 36  | 1   | no         | 58  | 67   | 112     | 49       | 79        | 110         | 19        | 84         | 108          | 14        | 82         | 109          |         |            |
| 19     | mild          | poor intake | dryness of mucus membrane | 41  | 1   | no         | 24  | 83   | 96      | 24       | 85        | 104         | 30        | 87         | 100          | 28        | 87         | 99           |         |            |
| 19     | mild          | vomiting    | Tachycardia               | 36  | 1   | no         | 35  | 82   | 114     | 33       | 80        | 110         | 26        | 82         | 106          |           |            |              |         |            |
| 20     | severe        | hemorrhage  | Tachycardia               | 32  | 1   | no         | 63  | 66   | 104     | 50       | 84        | 104         | 36        | 86         | 101          | 27        | 85         | 98           |         |            |
| 21     | mild          | diarrhoea   | dryness of mucus membrane | 42  | 1   | no         | 29  | 82   | 92      | 17       | 84        | 94          |           |            |              |           |            |              |         |            |
| 22     | mild          | sepsis      | Tachycardia               | 66  | 0   | no         | 52  | 75   | 112     | 46       | 83        | 112         | 29        | 86         | 108          | 20        | 91         | 106          | 14      | 95         |
| 23     | mild          | hemorrhage  | Tachycardia               | 26  | 1   | no         | 80  | 60   | 110     | 20       | 81        | 109         | 22        | 85         | 100          | 24        | 85         | 96           |         |            |
| 24     | severe        | hemorrhage  | hypotension               | 34  | 0   | no         | 60  | 59   | 114     | 45       | 58        | 110         | 30        | 72         | 108          | 24        | 75         | 100          | 17      | 80         |
| 25     | severe        | sepsis      | hypotension               | 44  | 1   | no         | 59  | 54   | 104     | 44       | 64        | 101         | 44        | 74         | 99           | 33        | 77         | 94           | 28      | 81         |
| 26     | mild          | poor intake | dryness of mucus membrane | 36  | 0   | no         | 30  | 87   | 88      | 23       | 84        | 86          | 25        | 85         | 86           | 14        | 87         | 79           |         |            |
| 27     | severe        | hemorrhage  | hypotension               | 26  | 0   | no         | 84  | 53   | 104     | 47       | 61        | 101         | 37        | 69         | 100          | 26        | 72         | 99           | 14      | 74         |
| 28     | mild          | hemorrhage  | Tachycardia               | 26  | 1   | no         | 32  | 84   | 109     | 17       | 82        | 108         | 33        | 85         | 100          |           |            |              |         |            |
| 29     | mild          | poor intake | dryness of mucus membrane | 29  | 1   | no         | 30  | 79   | 94      | 17       | 79        | 90          | 15        | 94         | 88           |           |            |              |         |            |
| 30     | severe        | hemorrhage  | hypotension               | 34  | 0   | no         | 55  | 60   | 121     | 48       | 70        | 120         | 25        | 74         | 116          | 23        | 80         | 108          |         |            |
| 31     | mild          | sepsis      | hypotension               | 46  | 1   | no         | 52  | 69   | 111     | 43       | 80        | 108         | 15        | 83         | 98           |           |            |              |         |            |
| 32     | moderate      | vomiting    | hypotension               | 50  | 0   | no         | 56  | 55   | 141     | 47       | 71        | 131         | 20        | 68         | 124          | 15        | 72         | 116          |         |            |
| 33     | mild          | poor intake | dryness of mucus membrane | 26  | 0   | no         | 27  | 79   | 88      | 27       | 81        | 86          | 20        | 83         | 84           | 8         | 85         | 80           |         |            |
| 34     | mild          | hemorrhage  | Tachycardia               | 34  | 1   | no         | 31  | 70   | 108     | 32       | 72        | 98          | 40        | 75         | 90           | 12        | 75         | 88           |         |            |
| 35     | mild          | hemorrhage  | hypotension               | 43  | 1   | no         | 55  | 79   | 94      | 49       | 81        | 92          | 13        | 84         | 89           |           |            |              |         |            |
| 36     | severe        | hemorrhage  | dryness of mucus membrane | 26  | 1   | no         | 73  | 61   | 104     | 40       | 73        | 98          | 26        | 76         | 92           |           |            |              |         |            |
| 37     | severe        | hemorrhage  | hypotension               | 49  | 0   | no         | 63  | 89   | 121     | 48       | 70        | 120         | 25        | 74         | 116          |           |            |              |         |            |
| 38     | moderate      | hemorrhage  | hypotension               | 21  | 1   | no         | 54  | 61   | 88      | 47       | 78        | 92          | 11        | 80         | 86           |           |            |              |         |            |
| 39     | mild          | poor intake | dryness of mucus membrane | 40  | 1   | no         | 25  | 84   | 90      | 19       | 87        | 89          |           |            |              |           |            |              |         |            |
| 40     | mild          | hemorrhage  | dryness of mucus membrane | 22  | 1   | no         | 28  | 70   | 60      | 16       | 78        | 66          |           |            |              |           |            |              |         |            |
| 41     | severe        | hemorrhage  | hypotension               | 32  | 1   | no         | 54  | 57   | 104     | 41       | 67        | 101         | 21        | 73         | 101          | 19        | 78         | 96           | 18      | 79         |
| 42     | mild          | poor intake | dryness of mucus membrane | 49  | 0   | no         | 49  | 73   | 88      | 29       | 82        | 86          | 22        | 87         | 76           |           |            |              |         |            |
| 43     | severe        | hemorrhage  | hypotension               | 21  | 0   | no         | 46  | 63   | 96      | 40       | 77        | 96          | 31        | 81         | 92           | 27        | 83         | 82           |         |            |
| 44     | mild          | hemorrhage  | dryness of mucus membrane | 26  | 1   | no         | 25  | 84   | 82      | 25       | 85        | 86          |           |            |              |           |            |              |         |            |
| 45     | moderate      | hemorrhage  | hypotension               | 36  | 0   | no         | 58  | 57   | 84      | 46       | 69        | 82          | 18        | 72         | 82           | 15        | 74         | 78           |         |            |
| 46     | mild          | hemorrhage  | Tachycardia               | 29  | 1   | no         | 37  | 77   | 102     | 23       | 78        | 100         | 35        | 81         | 96           | 10        | 81         | 94           |         |            |
| 47     | severe        | hemorrhage  | hypotension               | 29  | 0   | no         | 52  | 70   | 102     | 45       | 71        | 100         | 11        | 73         | 100          | 9         | 75         | 98           | 6       | 76         |
| 48     | severe        | hemorrhage  | hypotension               | 39  | 1   | no         | 55  | 67   | 98      | 46       | 88        | 98          | 20        | 93         | 96           | 14        | 91         | 94           |         |            |
| 49     | mild          | hemorrhage  | Tachycardia               | 26  | 0   | no         | 49  | 62   | 102     | 13       | 61        | 102         | 14        | 66         | 100          | 10        | 72         | 98           | 8       | 79         |
| 50     | mild          | diarrhoea   | Tachycardia               | 43  | 1   | no         | 24  | 77   | 98      | 11       | 81        | 92          | 16        | 83         | 86           |           |            |              |         |            |
| 51     | mild          | sepsis      | Tachycardia               | 24  | 0   | no         | 12  | 79   | 82      | 8        | 80        | 80          |           |            |              |           |            |              |         |            |
| 52     | mild          | hemorrhage  | hypotension               | 30  | 1   | no         | 22  | 57   | 106     | 18       | 57        | 104         |           |            |              |           |            |              |         |            |
| 53     | severe        | hemorrhage  | Tachycardia               | 36  | 0   | no         | 63  | 56   | 114     | 48       | 77        | 109         | 11        | 80         | 106          | 7         | 83         | 102          |         |            |
| 54     | mild          | poor intake | Tachycardia               | 24  | 1   | no         | 13  | 73   | 112     | 18       | 84        | 108         | 31        | 86         | 104          |           |            |              |         |            |
| 55     | moderate      | hemorrhage  | Tachycardia               | 26  | 0   | no         | 46  | 64   | 114     | 34       | 78        | 111         | 17        | 81         | 110          | 7         | 83         | 104          |         |            |
| 56     | mild          | poor intake | Tachycardia               | 21  | 1   | no         | 31  | 74   | 105     | 26       | 79        | 102         | 25        | 80         | 100          |           |            |              |         |            |
| 57     | moderate      | hemorrhage  | dryness of mucus membrane | 22  | 0   | no         | 12  | 79   | 90      | 39       | 79        | 86          | 12        | 82         | 80           |           |            |              |         |            |
| 58     | severe        | vomiting    | hypotension               | 31  | 0   | no         | 68  | 61   | 108     | 33       | 75        | 104         | 10        | 79         | 102          |           |            |              |         |            |
| 59     | mild          | hemorrhage  | hypotension               | 26  | 0   | no         | 35  | 75   | 106     | 33       | 75        | 104         |           |            |              |           |            |              |         |            |
| 60     | mild          | hemorrhage  | dryness of mucus membrane | 24  | 1   | no         | 16  | 101  | 131     | 17       | 103       | 111         |           |            |              |           |            |              |         |            |
| 60     | severe        | hemorrhage  | hypotension               | 25  | 0   | no         | 57  | 61   | 89      | 52       | 75        | 86          | 18        | 77         | 82           |           |            |              |         |            |
| 61     | mild          | vomiting    | dryness of mucus membrane | 19  | 0   | no         | 23  | 83   | 88      | 13       | 83        | 102         |           |            |              |           |            |              |         |            |
| 62     | mild          | sepsis      | dryness of mucus membrane | 40  | 1   | no         | 30  | 85   | 121     | 11       | 78        | 102         |           |            |              |           |            |              |         |            |
| 63     | mild          | hemorrhage  | dryness of mucus membrane | 40  | 0   | no         | 23  | 79   | 89      | 17       | 79        | 104         |           |            |              |           |            |              |         |            |
| 64     | moderate      | hemorrhage  | dryness of mucus membrane | 42  | 1   | no         | 28  | 88   | 84      | 20       | 85        | 114         |           |            |              |           |            |              |         |            |
| 65     | moderate      | hemorrhage  | dryness of mucus membrane | 33  | 1   | no         | 24  | 67   | 106     | 19       | 67        | 106         |           |            |              |           |            |              |         |            |
| 66     | mild          | hemorrhage  | dryness of mucus membrane | 34  | 1   | no         | 26  | 85   | 98      | 22       | 87        | 100         |           |            |              |           |            |              |         |            |
| 67     | severe        | sepsis      | dryness of mucus membrane | 25  | 0   | no         | 39  | 84   | 96      | 24       | 84        | 112         |           |            |              |           |            |              |         |            |
| 68     | mild          | hemorrhage  | Tachycardia               | 19  | 0   | no         | 27  | 77   | 114     | 18       | 79        | 100         |           |            |              |           |            |              |         |            |
| 69     | moderate      | vomiting    | Tachycardia               | 40  | 1   | no         | 24  | 81   | 111     | 21       | 82        | 104         |           |            |              |           |            |              |         |            |
| 70     | mild          | hemorrhage  | dryness of mucus membrane | 40  | 0   | no         | 33  | 86   | 82      | 21       | 86        | 88          |           |            |              |           |            |              |         |            |
| 71     | severe        | vomiting    | dryness of mucus membrane | 42  | 1   | no         | 21  | 81   | 90      | 16       | 81        | 92          | 32        | 79         | 99           | 22        | 83         | 92           |         |            |
| 74     | severe        | hemorrhage  | hypotension               | 38  | 0   | yes        | 54  | 61   | 106     | 46       | 78        | 102         |           |            |              |           |            |              |         |            |
| 75     | mild          | sepsis      | dryness of mucus membrane | 21  | 0   | no         | 34  | 85   | 86      | 25       | 87        | 24          | 40        | 93         | 72           |           |            |              |         |            |
| 76     | severe        | hemorrhage  | hypotension               | 65  | 0   | no         | 58  | 60   | 92      | 52       | 73        | 90          | 12        | 76         | 80           | 9         | 78         | 90           |         |            |
| 77     | moderate      | sepsis      | hypotension               | 34  | 1   | no         | 53  | 57   | 102     | 48       | 70        | 98          | 27        | 72         | 96           |           |            |              |         |            |
| 78     | severe        | sepsis      | hypotension               | 56  | 1   | no         | 76  | 61   | 99      | 48       | 68        | 99          | 25        | 70         | 96           | 22        | 73         | 92           |         |            |
| 79     | severe        | hemorrhage  | Tachycardia               | 48  | 0   | no         | 59  | 66   | 114     | 44       | 61        | 109         | 32        | 78         | 101          |           |            |              |         |            |
| 80     | mild          | hemorrhage  | hypotension               | 61  | 1   | no         | 51  | 70   | 94      | 39       | 70        | 92          |           |            |              |           |            |              |         |            |
| 81     | severe        | hemorrhage  | hypotension               | 36  | 0   | yes        | 53  | 59   | 114     | 46       | 74        | 111         | 36        | 78         | 98           |           |            |              |         |            |
| 82     | moderate      | hemorrhage  | Tachycardia               | 22  | 0   | no         | 32  | 77   | 109     | 23       | 79        | 98          | 12        | 80         | 96           | 15        | 83         | 90           |         |            |
| 83     | mild          | vomiting    | hypotension               | 28  | 0   | no         | 13  | 86   | 111     | 8        | 88        | 108         |           |            |              |           |            |              |         |            |
| 84     | mild          | diarrhoea   | dryness of mucus membrane | 51  | 0   | no         | 17  | 89   | 90      | 13       | 90        | 86          |           |            |              |           |            |              |         |            |
| 85     | mild          | diarrhoea   | dryness of mucus membrane | 39  | 1   | no         | 17  | 100  | 124     | 13       | 102       | 120         |           |            |              |           |            |              |         |            |
| 86     | mild          | hemorrhage  | dryness of mucus membrane | 50  | 0   | no         | 17  | 73   | 112     | 8        | 77        | 108         |           |            |              |           |            |              |         |            |
| 87     | mild          | hemorrhage  | dryness of mucus membrane | 26  | 1   | no         | 14  | 85   | 94      | 15       | 85        | 92          |           |            |              |           |            |              |         |            |
| 88     |               |             |                           |     |     |            |     |      |         |          |           |             |           |            |              |           |            |              |         |            |
